# Supplementary material for: Site-directed mutagenesis of the χ subunit of DNA polymerase III and single-stranded DNA-binding protein of E. coli reveals key residues for their interaction
Source: PubMed Central journal article supplement — Nucleic Acids Res. 2010 Oct 22;39(4):1398–407. doi: 10.1093/nar/gkq988 (PMC3045619; doi:10.1093/nar/gkq988), 2010-10-22
Supplement: supp_gkq988_gkq988_supporting_material.pdf [file supp_gkq988_gkq988_supporting_material.pdf]

## Supporting material

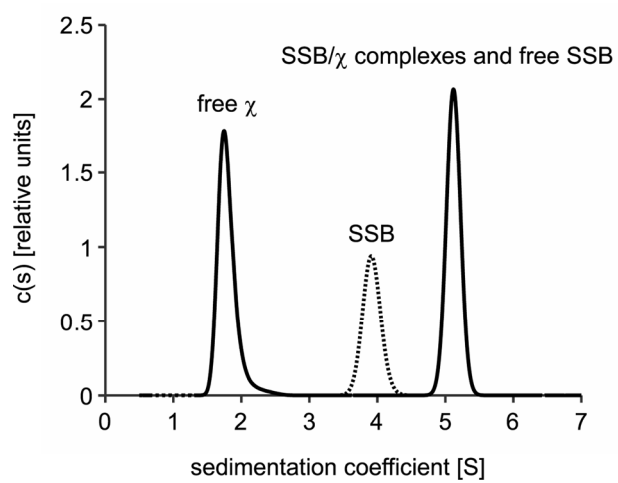

**Supplementary Figure S1: Interaction of EcoSSB and Eco $\chi$  at 20°C in 0.3 M NaCl, 0.5 mM DTT, 20 mM potassium phosphate pH 7.4.**  $c(s)$  distributions of sedimentation velocity experiments in the analytical ultracentrifuge for 2.5  $\mu$ M wild-type EcoSSB in the absence (dashed curve) or presence (solid curve) of 30  $\mu$ M Eco $\chi$ .

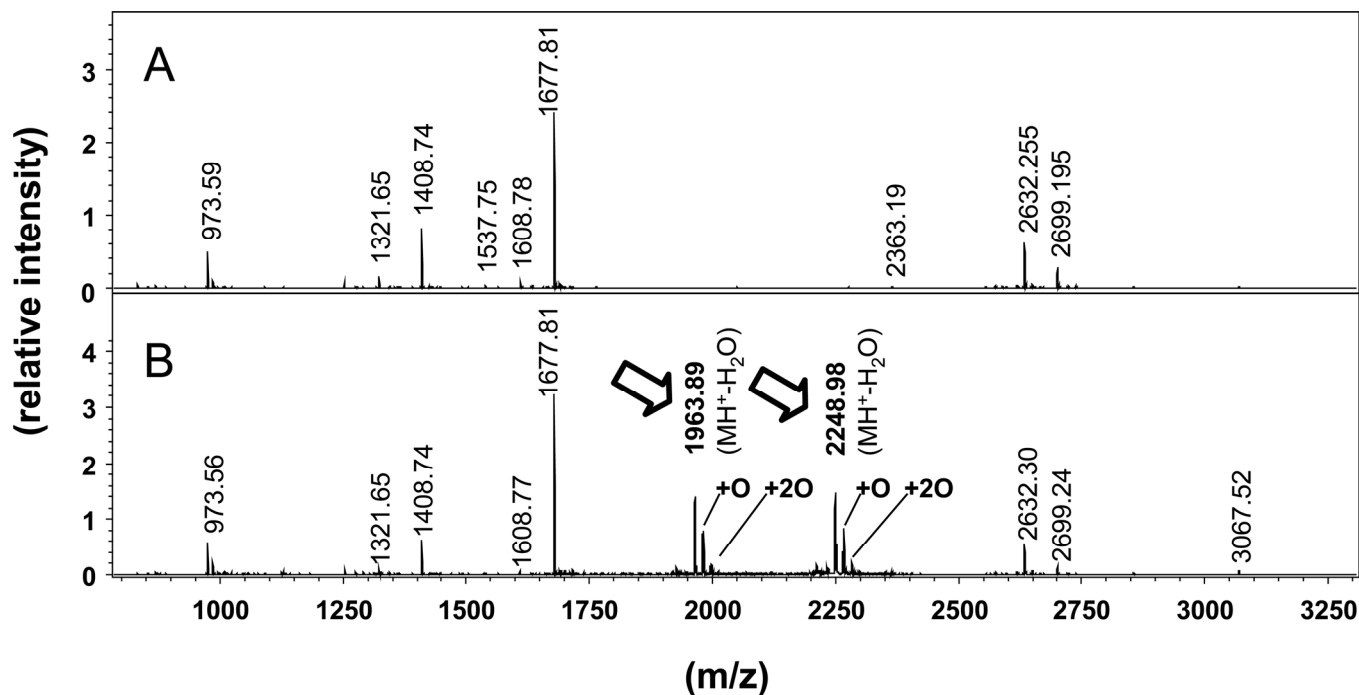

**Supplementary Figure S2: MS analysis of untreated and cross-linked  $\chi$  protein.**  $\chi$  protein untreated (A) or cross-linked with EDC to the SSB-Carb peptide (B) was digested with trypsin. Peptide masses were analysed by MALDI-MS and peptide mass fingerprints were generated.  $\chi$  protein cross-linked to the SSB-Carb peptide exhibited two additional mass signals of m/z 1963.89 and 2248.98 (arrows) that correspond to the cross-linked peptide Y131-R135 and E129-R135, respectively. Additional oxygen adducts were identified (+O; +2O).

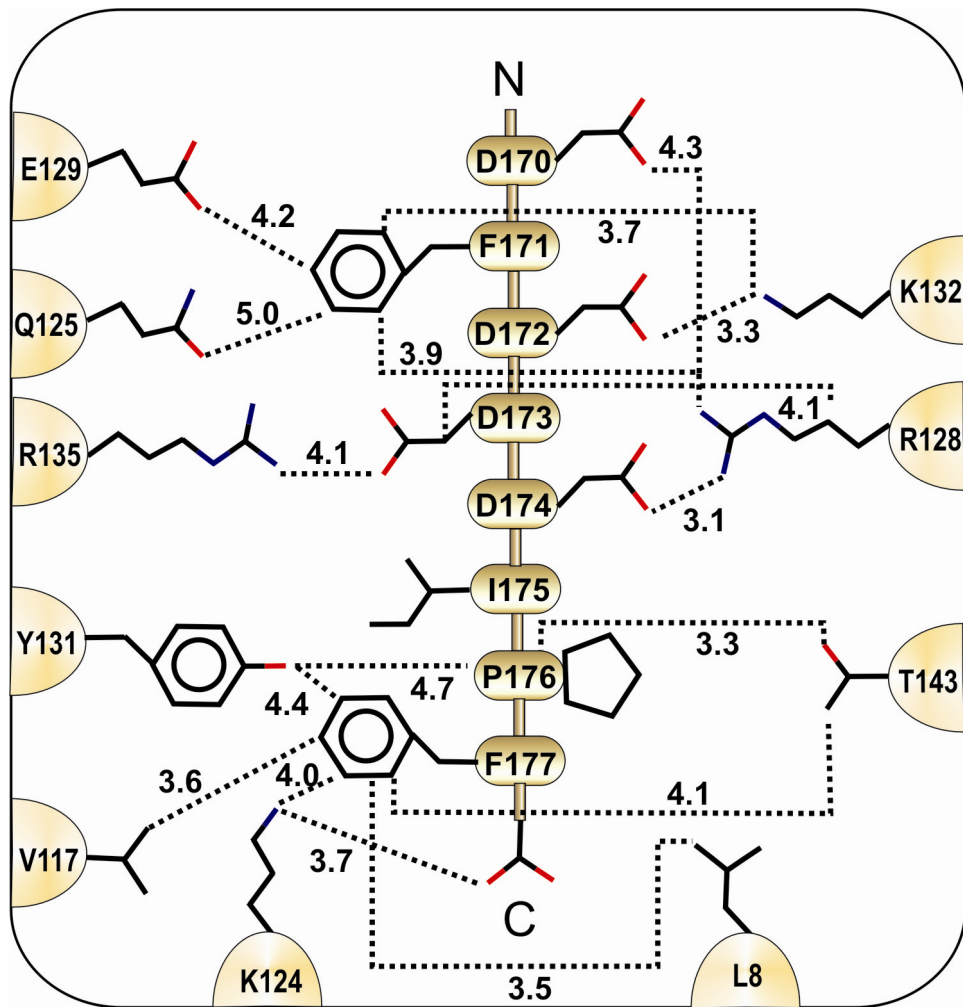

**Supplementary Figure S3: Schematic representation of the C-terminal residues of SSB (centre) interacting with  $\chi$  as predicted by our experimental data and molecular modelling. Distances in angstroms are indicated by dotted lines.**

| SSB    |       |       |       |       |       |       |       |
|--------|-------|-------|-------|-------|-------|-------|-------|
| $\chi$ |       | F171  | D172  | D173  | D174  | P176  | F177  |
| L8     |       |       |       |       |       |       | 3.5 Å |
| V117   |       |       |       |       |       |       | 3.6 Å |
| K124   |       |       |       |       |       | 3.7 Å | 4.0 Å |
| Q125   | 5.0 Å |       |       |       |       |       |       |
| R128   | 3.9 Å |       | 4.1 Å | 3.1 Å |       |       |       |
| E129   | 4.2 Å |       |       |       |       |       |       |
| Y131   |       |       |       |       | 4.7 Å | 4.4 Å |       |
| K132   | 3.7 Å | 3.3 Å |       |       |       |       |       |
| R135   |       |       | 4.1 Å |       |       |       |       |
| T143   |       |       |       |       | 3.3 Å | 4.1 Å |       |

**Supplementary Table S1: Distances of selected residues in the new model of SSB/ $\chi$  interaction as shown in Figure 5.** In the final model of SSB/ $\chi$  interaction, distances between important amino acid residues of SSB and  $\chi$  were measured with Coot (1). The colour labelling in the table refers to the type of interaction. Yellow: hydrophobic interaction; blue: electrostatic interaction and red: hydrogen bond.

|                                                                                 | Exol (A site) <sup>(2)</sup> | Exol (B site) <sup>(2)</sup> | RecQ <sup>(3)</sup>          | $\chi$ subunit of DNA polymerase III |
|---------------------------------------------------------------------------------|------------------------------|------------------------------|------------------------------|--------------------------------------|
| <b>Residues of hydrophobic pocket to accommodate C-terminal residues of SSB</b> | L147<br>L204<br>Y207         | W245<br>L264<br>C330         | L420<br>I423<br>L494<br>A498 | L8<br>V117<br>Y131<br>T143           |

**Supplementary Table S2: Residues of Exol, RecQ and the  $\chi$  subunit of DNA polymerase III involved in hydrophobic pocket formation at the SSB-binding sites.** All SSB-binding sites identified so far share common surface features (2, 3), such as a hydrophobic pocket to accommodate the ultimate C-terminus of SSB.

## References

1. Emsley,P. and Cowtan,K. (2004) Coot: model-building tools for molecular graphics. *Acta Crystallogr. D Biol. Crystallogr.*, **60**, 2126-2132.
2. Lu,D. and Keck,J.L. (2008) Structural basis of *Escherichia coli* single-stranded DNA-binding protein stimulation of exonuclease I. *Proc. Natl. Acad. Sci. U. S. A.*, **105**, 9169-9174.
3. Shereda,R.D., Reiter,N.J., Butcher,S.E. and Keck,J.L. (2009) Identification of the SSB binding site on *E. coli* RecQ reveals a conserved surface for binding SSB's C terminus. *J. Mol. Biol.*, **386**, 612-625.
